1 **Evolution of thermal physiology alters predicted species distributions under**  
2 **climate change**

3

4 Sara J.S. Wuitchik<sup>1,†,\*</sup>, Stephanie Mogensen<sup>1</sup>, Tegan N. Barry<sup>1</sup>, Antoine Paccard<sup>2,‡</sup>,

5 Heather A. Jamniczky<sup>3</sup>, Rowan D.H. Barrett<sup>2,§</sup>, and Sean M. Rogers<sup>1,4,§</sup>

6

7 <sup>1</sup>Department of Biological Sciences, University of Calgary, 2500 University Dr NW, Calgary,

8 AB, T2N 1N4, CANADA

9 <sup>2</sup>Redpath Museum and Department of Biology, McGill University, 845 Sherbrooke St W,

10 Montreal, QC, H3A 0G4, CANADA

11 <sup>3</sup>Department of Cell Biology & Anatomy, Cumming School of Medicine, University of Calgary,

12 3330 Hospital Dr NW, Calgary, T2N 4N1, CANADA

13 <sup>4</sup>Bamfield Marine Sciences Centre, 100 Pachena Rd, Bamfield, BC, V0R 1B0, CANADA

14 <sup>§</sup>equal co-senior authors

15

16

17

18

19 **\*Corresponding author: Sara J.S. Wuitchik**

20 E: [sjswuit@g.harvard.edu](mailto:sjswuit@g.harvard.edu)

21 T: 857-292-9977

†Present affiliations: Informatics Group, Harvard University, 38 Oxford St, Cambridge, MA, 02138, USA  
& Department of Biology, Boston University, 5 Cummington Mall, Boston, MA, 02215, USA

‡Present affiliation: McGill University Genome Center, 740 Dr Penfield Avenue, Montreal, QC, H3A  
1A5, Canada

22 Species distribution models (SDMs) are widely adopted to predict range shifts but can be  
23 unreliable under climate change scenarios<sup>1</sup> because they do not account for evolution. The  
24 thermal physiology of a species is a key determinant of range<sup>2,3</sup> but the impact of thermal trait  
25 evolution on SDMs has not been addressed. We identified a genetic basis for physiological traits  
26 that evolve in response to temperature change in threespine stickleback. Using these data, we  
27 created geographic range projections under two climate change scenarios where trait data was  
28 either static ('no evolution' model), allowed to evolve in agreement with published evolutionary  
29 rates for the trait ('evolution' model)<sup>4</sup>, or allowed to evolve with the rate of evolution scaled in  
30 association with the variance that is explained by QTL ('PVE' model). Here, we show that  
31 incorporating these traits and their evolution into SDMs substantially altered the predicted ranges  
32 for a widespread panmictic marine population, with increases in area of over 7-fold. Evolution-  
33 informed SDMs should therefore improve the precision of forecasting range dynamics under  
34 climate change, thereby aiding in their application to management and the protection of  
35 biodiversity<sup>5-7</sup>.

36 Temperature is a powerful driver of global biogeography and organism distributions  
37 frequently reflect temperature gradients in both aquatic and terrestrial habitats<sup>8</sup>. Many species  
38 adopt thermal strategies (such as thermoregulation or acclimation) that determine their thermal  
39 niche<sup>9-11</sup> and thermal traits can provide a target for directional selection if the environment  
40 changes to include temperatures outside the range encompassed by the thermal niche. Adaptation  
41 may thus permit species to persist at temperatures that would have previously led to  
42 extirpation<sup>12,13</sup>. Under moderate climate change scenarios, mean global oceanic temperature is  
43 predicted to increase in excess of 2°C by the end of the century<sup>14</sup>, with more extreme changes  
44 predicted in localized regions<sup>15</sup>. Predicting species distribution patterns under climate change

45 therefore requires data for temperature-associated adaptive trait evolution, which can vary by  
46 species and population. While there have been recent steps to incorporate theoretical trait  
47 evolution into SDMs<sup>3</sup>, to date, no model has used empirical estimates of evolutionary rate to  
48 inform predictions about future species distributions.

49 Due to widespread phenotypic variation<sup>16</sup>, genomic resources<sup>17</sup>, the availability of  
50 temperature-associated ecological and evolutionary trait data<sup>4</sup>, and the ability to artificially breed  
51 multiple hybrid generations in a common garden lab environment, threespine stickleback fish  
52 (*Gasterosteus aculeatus*, Fig. 1a) are a useful vertebrate species for understanding the impact of  
53 adaptation on range dynamics under climate change. Here, we incorporate the specific capacity  
54 of marine populations to adapt their physiology to rapidly changing climate conditions to  
55 characterize how adaptive trait variation affects projections of species range distributions under  
56 climate change<sup>18</sup>.

## 57 **Results**

58 We collected and reared wild marine and freshwater stickleback from two marine and  
59 two freshwater locations (Fig. 1b). These stickleback exhibited a wide thermal tolerance range  
60 bounded by a mean CTmin of 2.09 °C (+/- 1.13 °C SD) and a mean CTmax of 30.4 °C (+/- 2.64  
61 °C SD)(Fig. 1c) and also tolerated a wide range of temperatures within which there was no  
62 observable stress response (5.0 – 25.0 °C). To determine if these measured thermal traits have a  
63 genetic basis and could therefore be subject to adaptive evolution, we raised hybrid marine-  
64 freshwater F1 (N=2) and F2 (N=4) families under common garden conditions and used these fish  
65 for genome-wide linkage map construction (Table S1) and quantitative trait loci (QTL) mapping.  
66 Using 25,001 high-quality single nucleotide variants generated from restriction site-associated

67 DNA (RAD) sequencing, we identified one significant QTL for each thermal tolerance trait (Fig.  
68 2b) that explained a high percentage of trait variance (PVE; CT<sub>min</sub> = 54%, CT<sub>max</sub> = 64%).

69 We used these genetically based traits to inform the boundaries of three distinct  
70 environmental regions in species distribution models (SDMs) for marine stickleback based on  
71 varying levels of physiological performance: i) a ‘normal behaviour’ envelope with  
72 environmental temperatures associated with an absence of an observable behavioural stress  
73 response (5.0 to 25.0 °C), ii) a ‘within physiological limits’ envelope with environmental  
74 temperatures that fall within the range of the measured physiological limits (0.85 to 31.9 °C) ,  
75 and iii) an ‘outside of physiological limits’ envelope with environmental temperatures that fall  
76 outside the measured physiological limits (below 0.85 and above 31.9 °C). Based on sea ice  
77 extent and bathymetry alone, our present-day correlative SDM suggests a marine range  
78 distribution for these stickleback from the southern Bering Sea to northern Washington state, and  
79 along the southeast Alaskan Panhandle (combined shaded area in Fig. 3a). When we include  
80 species-specific thermal trait data from the wild marine populations, nearly the entire range of  
81 suitable habitat was unaffected by thermal tolerance limits, with the exception of a slight  
82 restriction at the northern end of the range (Fig. 3a). However, when restricted to the Normal  
83 Behaviour area, the range becomes confined to the west of the northern tip of Kodiak Island (Fig.  
84 3a), a limit coinciding with the northern-most known marine population in the Pacific Northwest  
85 genetic cluster<sup>19</sup>.

86 We next generated SDMs based on predicted end-of-century environmental variables  
87 according to the Intergovernmental Panel on Climate Change (IPCC) representative  
88 concentration pathways (RCPs) 4.5 and 8.5 from the Fifth Assessment Report<sup>14,20</sup>. End-of-  
89 century IPCC predictions resulted in a substantial increase in the overall suitable habitat area for

90 stickleback, with a 2.25-fold or 1,338,219 km<sup>2</sup> increase (combined shaded area in Fig. 3b-e) in  
91 association with a reduction in sea ice concentration at the northern end of the range. When  
92 temperature increases as predicted by RCP 4.5 in the ‘no evolution’ model, there is a 5.86-fold  
93 (1,011,949 km<sup>2</sup>) increase in the Normal Behaviour area within this newly suitable habitat (Fig.  
94 3b) when compared to the current day model. Under RCP 8.5 in the ‘no evolution’ model, the  
95 entirety of suitable habitat area remains within tolerable limits (Fig. 3c), with a smaller  
96 proportion of the range falling outside of the Normal Behaviour area compared to RCP 4.5  
97 (10.7%) ‘no evolution’ model.

98         Incorporating the evolution of CT<sub>min</sub> into the SDMs (‘evolution’ model) results in a  
99 large increase in the proportion of suitable habitat that falls within the Normal Behaviour area.  
100 We allowed CT<sub>min</sub> to evolve at a rate of 0.63 *haldanes*, which is equal to the rate observed for  
101 CT<sub>min</sub> in marine stickleback<sup>4</sup> (there are currently no empirical estimates of evolutionary rate for  
102 CT<sub>max</sub>). Under RCP 4.5, almost all (99.9%) of the suitable habitat range falls within the Normal  
103 Behaviour area (Fig. 3d), while under the RCP 8.5 ‘evolution’ model, the entire range of suitable  
104 habitat is within the Normal Behaviour area (Fig. 3e). These represent a 7.45-fold increase  
105 (1,336,123 km<sup>2</sup>) for RCP 4.5 and 7.46-fold increase (1,338,219 km<sup>2</sup>) for RCP 8.5 in the Normal  
106 Behaviour area when compared to the current day SDM.

107         We next considered the effect of limiting the evolutionary rate of CT<sub>min</sub> based on the  
108 observed genetic architecture of a single major effect locus (‘PVE’ model). Under the RCP 4.5  
109 ‘PVE’ model, we observed a 1.08-fold reduction in the Normal Behaviour area (109,120 km<sup>2</sup>,  
110 Fig. S3) when compared to the ‘evolution’ model (Fig. 3d). Under RCP 8.5 projections with the  
111 ‘PVE’ model, we observed a 3,905 km<sup>2</sup> decrease in the Normal Behaviour area (Fig. S3) when  
112 compared to the ‘evolution’ model (Fig. 3e). This relatively small reduction in Normal

113 Behaviour area with adjusted PVE for the thermal traits under RCP 8.5 still results in a  
114 1,334,314 km<sup>2</sup> increase in area compared to the current day SDM.

## 115 **Discussion**

116 We assessed the critical thermal minimum (CT<sub>min</sub>) and maximum (CT<sub>max</sub>) for  
117 threespine stickleback from wild marine and freshwater populations, as well as F1 and F2  
118 families in order to determine the genetic basis underlying traits that will be important for  
119 population persistence under climate change. We incorporated the empirical ecological and  
120 evolutionary trait data from wild marine populations into mechanistic species distribution models  
121 under two climate change scenarios. We estimated the species distribution in the Pacific  
122 Northwest marine environment while these traits were held constant ('no evolution'), allowed  
123 CT<sub>min</sub> to evolve in accordance with evolutionary rate estimates ('evolution'), and allowed  
124 CT<sub>min</sub> to evolve at a constrained rate associated with the percent of trait variance explained by  
125 the single QTL we detected ('PVE'). The geographic ranges predicted for the end-of-century  
126 species distributions increased by over 7-fold (RCP 4.5: 1,336,123 km<sup>2</sup>; RCP 8.5: 1,338,219  
127 km<sup>2</sup>) when CT<sub>min</sub> was allowed to evolve, a substantial increase over the 'no evolution' model.  
128 Additionally, when CT<sub>min</sub> evolution was constrained in the PVE model, there remained a ~6-  
129 fold increase (RCP 4.5: 1,227,002 km<sup>2</sup>; RCP 8.5: 1,334,314 km<sup>2</sup>) in the geographic range  
130 compared to current day. These differences in the predicted distributions underline the  
131 significance of incorporating empirical evolutionary data into SDMs<sup>5,21,22</sup>, and in particular the  
132 need to consider behaviour in addition to physiology when predicting range shifts<sup>23</sup>.

133 While the results presented here showcase the importance of creating more robust and  
134 informed SDMs, they also highlight a number of aspects that will benefit from additional  
135 consideration when interpreting these models. The existing estimate of CT<sub>min</sub> evolution in

136 sticklebacks considered the change in phenotypic variation across generations<sup>4</sup>, rather than  
137 evolution at underlying loci. As such, it is likely that some proportion of the observed phenotypic  
138 change was due to plastic responses. In our PVE model, we take a conservative approach by  
139 restricting phenotypic evolution of CTmin to only occur through heritable change via the locus  
140 shown to be associated with the trait. The efficiency of translating the selection acting on a trait  
141 into evolutionary response across generations can depend on the genetic architecture of the  
142 trait<sup>24</sup>. The large effect loci that we identified here are consistent with expectations from theory  
143 suggesting that prolonged bouts of adaptation with gene flow (as expected in this system<sup>24–26</sup>)  
144 should favour architectures characterized by fewer, larger effect, more tightly linked alleles<sup>27–29</sup>.  
145 However, it should be noted that the effects of the two QTL identified here are likely  
146 overestimated and other loci might have gone undetected (*sensu* the Beavis Effect<sup>30</sup>). The joint  
147 action of plastic effects and evolution at undetected loci might therefore result in range  
148 distributions that are more similar to those predicted in our ‘evolution’ models.

149         Climate change is leading to an increase in the frequency of extreme temperature  
150 events<sup>14,31</sup>, including both extreme heat and extreme cold<sup>32–34</sup>, which could drive selection on  
151 both CTmin and CTmax<sup>13,35–37</sup>. Our models reveal that the evolution of cold tolerance can have a  
152 significant impact on predicted range distributions despite most end-of-century climate change  
153 scenarios involving an overall warmer, not cooler world. This counterintuitive result occurs  
154 because climate change opens up newly available thermal niche space in waters north of the  
155 current day geographic range<sup>20</sup>, and the evolution of CTmin extends this range expansion further  
156 still. Northward range expansion with climate change due to increasing habitat availability has  
157 also been documented in birds<sup>38–41</sup>, plants<sup>42</sup>, other fishes<sup>43–45</sup>, and pest species (such as ticks<sup>46–48</sup>  
158 and mountain pine beetle<sup>49,50</sup>), as well as in large scale analyses of diverse taxa assessing the

159 ‘fingerprints’ of climate change impacts<sup>51,52</sup>. However, it is likely that evolution of CTmax will  
160 also play a role in responses to environmental change<sup>53–55</sup>. Although we have no empirical  
161 estimates of CTmax evolution, it is interesting to explore how distributions would shift if we  
162 observed the same rate of evolution in this trait as in CTmin. Using the same rate of haldanes and  
163 incorporating our observed PVE for the locus associated with CTmax, we find that geographic  
164 ranges predicted for the end-of-century species distributions also increased by over 7-fold (RCP  
165 4.5: 1,227,002 km<sup>2</sup> increase; RCP 8.5: 1,334,314 km<sup>2</sup> increase; Fig. S4). Further investigations to  
166 test the empirical rate of evolution of thermal behaviour, physiology and the molecular  
167 underpinnings of these key traits would be well served by assessing additional samples along the  
168 latitudinal gradient inhabited by stickleback to gain a more detailed understanding of these  
169 temperature-associated traits over a wider environmental range.

170 Collectively, the inclusion of thermal traits and their evolution alters the projected ranges  
171 of threespine stickleback, with a substantial increase in the predicted area that the species will  
172 occupy under climate change forecasts. Many traits are evolving in response to climate change<sup>56–</sup>  
173 <sup>59</sup> and SDMs that do not take trait data (and trait evolution) into account could provide inaccurate  
174 predictions about future species distributions under climate change<sup>3</sup> - an issue of particular  
175 concern for species at risk and pest species undergoing range expansion<sup>60–62</sup>. Our results provide  
176 a framework for addressing this problem, which will have critical implications for the application  
177 of these models in policy and resource management, and the protection of biodiversity in a  
178 changing climate.



## 179 **Materials and Methods**

### 180 Sample collection and husbandry

181 We collected adult *Gasterosteus aculeatus* (Fig. 1a) from two marine populations  
182 (Bamfield, M1, 48°49'12.69"N 125° 8'57.90"W; Garden Bay Lagoon, M2, 49°37'52.84"N 124°  
183 1'49.26"W) and two freshwater populations (Hotel Lake, FW1, 49°38'26.94"N 124° 3'0.69"W;  
184 Klein Lake, FW2, 49°43'32.47"N 123°58'7.83"W) in southwestern British Columbia (Fig. 1b).  
185 Individuals were maintained in a flow-through system and photoperiod that mimicked the source  
186 populations during collection periods before transport. We transported the fish to our aquatics  
187 facility in the Life and Environmental Sciences Animal Resources Centre at the University of  
188 Calgary, where we separated the fish into population-specific 113 L glass aquaria at a density of  
189 approximately 20 fish per aquarium. We acclimated marine individuals to freshwater salinity  
190 over one week and maintained fish in a common environment (salinity of 4-6 ppt, water  
191 temperature of  $15 \pm 2$  °C, and a photoperiod of 16L:8D). Individuals were allowed to acclimate  
192 for at least 2 weeks before experiments (1 week for stress reduction post-transfer, 1 week for  
193 common garden environment acclimation and salinity ramp). Each common garden aquarium  
194 was on a closed system with individual filters, air stones, and water supply. We fed all adult fish  
195 *ad libitum* once per day with thawed bloodworms (Hikari Bio-Pure Frozen Bloodworms). All  
196 collections and transfers were approved by the Department of Fisheries and Oceans (marine  
197 collections and transfers), the Ministry of Forests, Lands, and Natural Resource Operations  
198 (freshwater collections), and the Huu-ay-aht First Nations (marine collections).

### 199 Crossing design for marine and freshwater F1 families

200 We collected eggs from females and fertilized the eggs with extracted testes from  
201 euthanized males. We transferred the fertilized egg mass to a mesh-bottomed egg incubator

202 suspended in a 37 L aquarium for hatching. Each hatching aquarium was maintained with a  
203 single air stone and a filter. Once hatched, we reared the larval fish in 37 L hatching aquaria until  
204 they reached a total length (TL) of approximately 1 cm, after which we split the families into  
205 family-specific 113 L aquaria to maintain suitable densities. We fed the larval fish *ad libitum*  
206 twice daily with live *Artemia spp.* nauplii, and then gradually transitioned the diet to chopped,  
207 thawed bloodworms (Hikari Bio-Pure Frozen Bloodworms) *ad libitum* once daily as they  
208 reached approximately 2 cm TL. The F1 families were maintained in a common garden  
209 environment identical to that of the F0 populations. We produced one F1 family for each  
210 population (M1\_F1, M2\_F2, FW1\_F1, and FW2\_F1).

#### 211 Crossing design for hybrid mapping families

212 To generate genetically heterogeneous marine-freshwater F1 families from wild F0  
213 parents, we collected eggs from marine females and fertilized the eggs with extracted testes from  
214 euthanized freshwater males. Egg masses were hatched, and juveniles were reared, as detailed  
215 above. Overall, we produced one F1 family of M1xFW1 hybrids (hereafter referred to as H1\_F1)  
216 and three F1 families of M1xFW2 hybrids (hereafter referred to as H2\_F1). The hybrid F1  
217 families were maintained in a common garden environment identical to that of the F0  
218 populations. To generate F2 families for linkage map construction, we crossed individuals from  
219 the same F1 family with the same methodology used to generate the F1 families. Overall, we  
220 produced one F2 family of H1xH1 hybrids (referred to as H1\_F2) and three families of H2xH2  
221 hybrids (referred to as H2\_F2\_1, H2\_F2\_2, and H2\_F2\_3). All F2 individuals were raised as  
222 described above in a common garden environment identical to that of the F0 and F1 individuals  
223 to ensure consistent history and use for QTL mapping.

## 224 Thermal tolerance experiments

225 To assess the lower and upper limits of physiological thermal tolerance, we conducted  
226 standard critical thermal minimum (CTmin) and maximum (CTmax) experiments on adult  
227 fish<sup>4,63,64</sup>. At these sublethal limits, the fish experiences a loss of equilibrium (LOE) at which  
228 they lose the ability to escape conditions that would ultimately lead to their death in nature<sup>65</sup>. Our  
229 experimental tank held 1000 mL glass beakers aerated individually to prevent thermal  
230 stratification. Before each experiment, individuals were fasted for 24 hours. After a 15-minute  
231 acclimation to the experimental apparatus in the individual beakers, we cooled or heated the  
232 water (for CTmin or CTmax, respectively) at a rate of approximately 0.33 °C min<sup>-1</sup>. We assessed  
233 wild F0 individuals ( $n_{M1} = 32$ ,  $n_{M2} = 14$ ,  $n_{FW1} = 15$ ,  $n_{FW2} = 16$ ,  $N = 77$ ; Fig. 1c) and lab raised F1  
234 ( $n_{M1\_F1} = 13$ ,  $n_{M2\_F1} = 15$ ,  $n_{FW1\_F1} = 15$ ,  $n_{FW2\_F1} = 15$ ,  $N = 58$ ; Fig. S1) and F2 individuals ( $n_{H1\_F2}$   
235  $= 28$ ,  $n_{H2\_F2\_1} = 36$ ,  $n_{H2\_F2\_2} = 21$ ,  $n_{H2\_F2\_3} = 17$ ,  $N = 102$ ; Fig. S2). All individuals were  
236 assessed for CTmin, allowed to recover for at least three days, then assessed for CTmax to keep  
237 thermal stress history consistent. The onset of erratic behaviours associated with a behavioural  
238 stress response occurred below 5.0 °C and above 25.0 °C during CTmin and CTmax  
239 experiments, respectively. Normal behaviour was observed between 5.0 °C and 25.0 °C, whereas  
240 outside of those temperatures, individuals gradually exhibited more extreme stress responses  
241 (e.g., increased gilling rate, erratic movement, muscle spasms, listing, as outlined by the  
242 Canadian Council of Animal Care guidelines) until reaching LOE and the inability of an  
243 individual to right itself (the experimental endpoint)<sup>4,63,64</sup>. At the time of data collection for  
244 thermal trait experiments, all individuals were adults.

245 Isolation and characterization of single nucleotide polymorphisms (SNPs)

246 Genomic DNA was extracted from caudal fin tissue using a phenol-chloroform-based  
247 protocol. We digested tissues overnight in digestion buffer and proteinase K at 55 °C, then  
248 performed multiple phenol-chloroform and ethanol washes to isolate the DNA. We assessed the  
249 quantity of the extracted DNA using the Quant-iT PicoGreen dsDNA assay kit (ThermoFisher  
250 Scientific, Waltham, MA, USA) and Synergy HT plate reader with the Gen5 associated software  
251 (BioTek, Winooski, VT, USA). We prepared restriction site-associated DNA (RAD)  
252 libraries (Peterson et al. 2012) using *MluCI* and *NlaIII* restriction (New England Biolabs,  
253 Ipswich, MA, USA), ligation of individual barcodes, and pooling of 48 individuals per library at  
254 equimolar concentrations. We performed a final PCR to amplify DNA and add library-specific  
255 indices to allow for pooling of multiple libraries. We sequenced three libraries at McGill  
256 University and Génome Québec Innovation Center on one lane of Illumina HiSeq 4000 (Illumina  
257 Inc., San Diego, CA, USA).

258 Assembly of genetic linkage map

259 After barcode demultiplexing and filtering out low quality reads in STACKS<sup>66</sup>, we  
260 removed PCR duplicates from the raw sequences and aligned to the *G. aculeatus* reference  
261 genome<sup>17</sup> using the Burrows-Wheeler transform<sup>67</sup>. Individual libraries were concatenated and  
262 filtered<sup>68</sup> using *vcftools* v3.0<sup>69</sup> and then split into chromosome-specific VCF files to assemble the  
263 linkage maps chromosome by chromosome. We assigned markers to a linkage group with an  
264 initial LOD score of 3 after filtering out markers that showed high levels of segregation  
265 distortion and missing observations (> 20% missing data) in Lep-MAP3<sup>70</sup>. Unassigned markers  
266 were subsequently added to the existing linkage group at a LOD score of 3 and a size limit of 5  
267 markers per linkage group. We ordered the markers using a minimum posterior value of 0.001

268 and collapsed multiple markers when the probability difference between markers was  $< 0.01$ <sup>70</sup>.  
269 The final linkage map was subset for use in R<sup>71</sup> with a custom Python script to visualize the  
270 linkage map and to generate a list of informative SNPs to use in subsequent analyses with the *qtl*  
271 v1.44-9<sup>72</sup> and *qtlTools* v1.2.0<sup>73</sup> packages. Linkage maps were visualized using  
272 *LinkageMapView*<sup>74</sup> in R<sup>71</sup>. The final linkage maps were similar across families in number of  
273 markers, length, and spacing between markers, though the H1\_F2 map did have a higher density  
274 of markers (Table S1).

### 275 Quantitative trait loci (QTL) mapping

276 We analysed families separately with the same methodology to assess the presence of  
277 QTL associated with the thermal traits. We calculated conditional genotype probabilities using  
278 hidden Markov model technology and simulated genotypes based on the observed marker data  
279 (allowing for possible genotyping errors at a level of 0.0001 using a Kosambi mapping function  
280 with a fixed step width) prior to running genome scans with a single QTL model<sup>75,76</sup>. We  
281 determined the logarithm of the odds (LOD) score significance thresholds for each trait through  
282 permutation tests for each family (100,000 permutations) (Fig. 2a). We pulled significant QTL  
283 above the genome-wide significance threshold ( $\alpha = 0.05$ <sup>77</sup>), calculated confidence intervals of  
284 QTL location based on nearby markers, and estimated the percent variance explained by each  
285 QTL peak marker. We identified two QTL on linkage group 4 (which corresponds to  
286 chromosome 4 of the BROAD assembly<sup>17</sup>) associated with CTmin and CTmax (Fig. 2b).

### 287 Environmental variables and species distribution models (SDMs)

288 We compiled environmental data widely used in the construction of SDMs to estimate  
289 suitable habitat in both present day and end-of-century forecasts<sup>78</sup>, including bathymetry, sea ice  
290 extent and concentration, salinity, and sea surface temperature. We used 2014 data as our

291 baseline year to match the forecasting baseline of the Fifth Assessment Report<sup>14</sup>. We assumed a  
292 suitable habitat range for this species in the Pacific Northwest to consist of coastal areas (where  
293 the water depth is less than 200 m) where sea ice is never present (*i.e.*, no sea ice at the  
294 maximum extent). The salinity tolerance for *G. aculeatus* is very wide<sup>79,80</sup> and salinity was not  
295 limiting in any of the habitat<sup>81</sup>, therefore salinity was not included in the final present day or  
296 forecasted models. We obtained bathymetry data from the General Bathymetric Chart of the  
297 Oceans (GEBCO) of the British Oceanographic Data Centre<sup>82</sup>, and maximum sea ice extent data  
298 from the Multisensory Analyzed Sea Ice Extent – Northern Hemisphere (MASIE-NH) product<sup>83</sup>.  
299 We obtained maximum and minimum daily mean sea surface temperature (SST)<sup>84</sup>. Sea surface  
300 temperature was used as a proxy for water temperature. Stickleback thermal trait data were used  
301 to set the limits of the distribution within the possible area delineated by sea ice free water of a  
302 suitable depth (Table S2). The thermal trait measurements were all based on our experimental  
303 findings reported here.

304 In the end-of-century forecast for suitable habitat, we assumed bathymetry to be  
305 consistent with the modern scenario. However, the Arctic Ocean is predicted to be  
306 predominantly free of sea ice in the summer by the end of the century<sup>85</sup>, with significant end-of-  
307 century reductions in winter/spring sea ice concentration (reduced to a concentration of 0.1 at the  
308 Seward Peninsula<sup>85</sup>), so we conservatively set the maximum northern extent of the suitable  
309 habitat to be 65°35' N, which corresponds to the western tip of the Seward Peninsula (near  
310 Wales, AK). The extent of sea ice was kept consistent between scenarios to control for area in  
311 calculations of range expansion. The water temperatures were increased based on projections for  
312 large marine ecosystems of Northern Oceans from global climate models<sup>14,20</sup>. Maps were created  
313 in R<sup>71</sup> using the packages *raster* v. 3.3-13<sup>86</sup> and *rgeos* v. 0.5-3<sup>87</sup>.

314 We incorporated the experimental data from the critical thermal minimum and maximum  
315 trials on the wild marine populations (Fig. 1c) to understand how trait inclusion may affect range  
316 projections under climate change. These trait-defined envelopes were overlain on the suitable  
317 habitat background to delineate projected presence based on thermal traits in both current day  
318 and IPCC predicted RCPs 4.5 and 8.5. The trait values were kept constant (*i.e.*, not changed) in  
319 the ‘no evolution’ projections, but in the ‘evolution’ projections, we allowed CTmin to evolve an  
320 improvement of 2.5 °C (*i.e.*, 2.5 °C lower than CTmin boundary in the ‘no evolution’ projection)  
321 by the end of the century based on a rate of 0.63 *haldanes* from a selection experiment  
322 previously conducted on populations from this same genetic cluster<sup>4</sup>. The ‘evolution’ model  
323 assumes whole-organism tolerance evolution with selection acting on 100% of the loci affecting  
324 CTmin evolution. Therefore, to account for the observed genetic architecture of a single, large  
325 effect locus associated with CTmin, we next considered a ‘PVE’ model, where CTmin was  
326 allowed to evolve to only 54% of the total estimated trait value from the ‘evolution’ model (*i.e.*,  
327 2.5 °C \* 0.54). However, a notable restriction in the evolution of CTmin for both models  
328 (‘evolution’ and ‘PVE’) was a hard boundary drawn at 0 °C under the assumption that  
329 population persistence in a sub-zero environment would require many additional adaptations  
330 alongside CTmin improvement (*e.g.*, extreme adaptations observed in Antarctic notothenioid  
331 fishes<sup>88–90</sup>).

332 To quantify the differences in estimated suitable habitat under current day and end-of-  
333 century conditions, we compared areas for each warming scenario to the equivalent scenario  
334 under current conditions. Similarly, to compare the differences in evolutionary scenarios, the  
335 area of each end-of-century evolutionary trajectory was compared to either the contrasting RCP  
336 projection or adjusted PVE projection. For these comparisons, we used North Pole Lambert

337 azimuthal equal area projection for all maps, and georeferenced to known landmarks in ArcGIS  
338 v10.8<sup>91</sup> to calculate area from the maps generate in R<sup>71</sup> (conversion ratio of 7873.42).

339 The datasets generated and analysed during the current study are available from the  
340 corresponding author upon reasonable request. The annotated code, including all parameter  
341 thresholds, for the above QTL analyses and SDM construction is publicly available on Github  
342 ([github.com/sjswitchik/gasAcu\\_qtl\\_sdm](https://github.com/sjswitchik/gasAcu_qtl_sdm)).

343

## 344 **References**

- 345 1. Kearney, M. R., Wintle, B. A. & Porter, W. P. Correlative and mechanistic models of  
346 species distribution provide congruent forecasts under climate change. *Conserv. Lett.* **3**,  
347 203–213 (2010).
- 348 2. Kearney, M. & Porter, W. Mechanistic niche modelling: Combining physiological and  
349 spatial data to predict species' ranges. *Ecol. Lett.* **12**, 334–350 (2009).
- 350 3. Bush, A. *et al.* Incorporating evolutionary adaptation in species distribution modelling  
351 reduces projected vulnerability to climate change. *Ecol. Lett.* **19**, 1468–1478 (2016).
- 352 4. Barrett, R. D. H. *et al.* Rapid evolution of cold tolerance in stickleback. *Proc. R. Soc. B*  
353 **278**, 233–238 (2011).
- 354 5. Evans, T. G., Diamond, S. E. & Kelly, M. W. Mechanistic species distribution modelling  
355 as a link between physiology and conservation. *Conserv. Physiol.* **3**, 1–16 (2015).
- 356 6. Pearce, J. & Lindenmayer, D. Bioclimatic analysis to enhance reintroduction biology of  
357 the endangered helmeted honeyeater (*Lichenostomus melanops cassidix*) in southeastern



- 358 Australia. *Restor. Ecol.* **6**, 238–243 (1998).
- 359 7. Araújo, M. B., Cabeza, M., Thuiller, W., Hannah, L. & Williams, P. H. Would climate  
360 change drive species out of reserves? An assessment of existing reserve-selection  
361 methods. *Glob. Chang. Biol.* **10**, 1618–1626 (2004).
- 362 8. Hochachka, P. W. & Somero, G. N. Mechanism and process in physiological evolution.  
363 *Biochem. Adapt.* **480**, (2002).
- 364 9. Huey, R. B. & Slatkin, M. Costs and benefits of lizard thermoregulation. *Q. Rev. Biol.* **51**,  
365 363–384 (1976).
- 366 10. Coutant, C. C. Thermal preference: when does an asset become a liability? *Environ. Biol.*  
367 *Fishes* **18**, 161–172 (1987).
- 368 11. Huey, R. B. & Kingsolver, J. G. Evolution of thermal sensitivity of ectotherm  
369 performance. *Trends Ecol. Evol.* **4**, 131–135 (1989).
- 370 12. Sexton, J. P., McIntyre, P. J., Angert, A. L. & Rice, K. J. Evolution and Ecology of  
371 Species Range Limits. *Annu. Rev. Ecol. Evol. Syst.* **40**, 415–436 (2009).
- 372 13. Hoffman, A. & Sgrò, C. Climate change and evolutionary adaptation. *Nature* **470**, 479–  
373 485 (2011).
- 374 14. IPCC. *Climate Change 2014: Synthesis Report. Fifth Assessment Report of the*  
375 *Intergovernmental Panel on Climate Change* (2014). doi:10.1016/S0022-0248(00)00575-  
376 3
- 377 15. Eyer, P. A., Blumenfeld, A. J. & Vargo, E. L. Sexually antagonistic selection promotes

- 378 genetic divergence between males and females in an ant. *Proc. Natl. Acad. Sci. U. S. A.*  
379 **116**, 24157–24163 (2019).
- 380 16. Hendry, A. P., Peichel, C. L., Matthews, B., Boughman, J. W. & Nosil, P. Stickleback  
381 research: The now and the next. *Evol. Ecol. Res.* **15**, 111–141 (2013).
- 382 17. Jones, F. C. *et al.* The genomic basis of adaptive evolution in threespine sticklebacks.  
383 *Nature* **484**, 55–61 (2012).
- 384 18. Barrett, R. D. H. & Hendry, A. P. Evolutionary rescue under environmental change. in  
385 *Behavioural responses to a changing world: mechanisms and consequences* 216–233  
386 (Oxford University Press Oxford, UK, 2012).
- 387 19. Morris, M. R. J., Bowles, E., Allen, B. E., Jamniczky, H. A. & Rogers, S. M.  
388 Contemporary ancestor? Adaptive divergence from standing genetic variation in Pacific  
389 marine threespine stickleback. *BMC Evol. Biol.* **18**, 1–21 (2018).
- 390 20. Alexander, M. A. *et al.* Projected sea surface temperatures over the 21st century: Changes  
391 in the mean, variability and extremes for large marine ecosystem regions of Northern  
392 Oceans. *Elementa* **6**, (2018).
- 393 21. Buckley, L. *et al.* Can mechanism inform species' distribution models? *Ecol. Lett.* **13**,  
394 1041–1054 (2010).
- 395 22. Lyon, N. J., Debinski, D. M. & Rangwala, I. Evaluating the Utility of Species Distribution  
396 Models in Informing Climate Change-Resilient Grassland Restoration Strategy. *Front.*  
397 *Ecol. Evol.* **7**, 1–8 (2019).

- 398 23. Sunday, J. M., Bates, A. E. & Dulvy, N. K. Thermal tolerance and the global  
399 redistribution of animals. *Nat. Clim. Chang.* **2**, 686–690 (2012).
- 400 24. Rogers, S. M. *et al.* Genetic Signature of Adaptive Peak Shift in Threespine Stickleback.  
401 *Evolution (N. Y.)*. 2439–2451 (2012). doi:10.5061/dryad.6jj614kh
- 402 25. Schluter, D., Marchinko, K. B., Barrett, R. D. H. & Rogers, S. M. Natural selection and  
403 the genetics of adaptation in threespine stickleback. *Philos. Trans. R. Soc. B Biol. Sci.* **365**,  
404 2479–2486 (2010).
- 405 26. Jones, F. C. *et al.* A genome-wide SNP genotyping array reveals patterns of global and  
406 repeated species-pair divergence in sticklebacks. *Curr. Biol.* **22**, 83–90 (2012).
- 407 27. Yeaman, S. & Otto, S. P. Establishment and maintenance of adaptive genetic divergence  
408 under migration, selection, and drift. *Evolution (N. Y.)*. **65**, 2123–2129 (2011).
- 409 28. Yeaman, S. & Whitlock, M. C. The genetic architecture of adaptation under migration-  
410 selection balance. *Evolution (N. Y.)*. **65**, 1897–1911 (2011).
- 411 29. Via, S., Conte, G., Mason-Foley, C. & Mills, K. Localizing FST outliers on a QTL map  
412 reveals evidence for large genomic regions of reduced gene exchange during speciation-  
413 with-gene-flow. *Mol. Ecol.* **21**, 5546–5560 (2012).
- 414 30. Beavis, W. The power and deceit of QTL experiments: lessons from comparative QTL  
415 studies. in *49th Annual Corn & Sorghum Research Conference* 250–266 (1994).
- 416 31. Stott, P. How climate change affects extreme weather events. *Science (80- )*. **352**, 1517–  
417 1518 (2016).

- 418 32. Herring, S., Hoerling, M., Kossing, J., Peterson, T. & Stott, P. Explaining extreme events  
419 of 2014 from a climate perspective. **96**, 1–180 (2015).
- 420 33. Herring, S. C. *et al.* Explaining extreme events of 2016 from a climate perspective. *Bull.*  
421 *Am. Meteorol. Soc.* **99**, S1–S157 (2018).
- 422 34. Herring, S. C., Christidis, N., Hoell, A., Hoerling, M. P. & Stott, P. Explaining extreme  
423 events of 2018 from a climate perspective. *Bull. Am. Meteorol. Soc.* **101**, 1–146 (2020).
- 424 35. Kingsolver, J. G. *et al.* Complex life cycles and the responses of insects to climate change.  
425 *Integr. Comp. Biol.* **51**, 719–732 (2011).
- 426 36. Denny, M. W. & Dowd, W. W. Biophysics, environmental stochasticity, and the evolution  
427 of thermal safety margins in intertidal limpets. *J. Exp. Biol.* **215**, 934–947 (2012).
- 428 37. Buckley, L. B. & Huey, R. B. How extreme temperatures impact organisms and the  
429 evolution of their thermal tolerance. *Integr. Comp. Biol.* **56**, 98–109 (2016).
- 430 38. Tingley, M. W., Monahan, W. B., Beissinger, S. R. & Moritz, C. Birds track their  
431 Grinnellian niche through a century of climate change. *Proc. Natl. Acad. Sci. U. S. A.* **106**,  
432 19637–19643 (2009).
- 433 39. Melles, S. J., Fortin, M. J., Lindsay, K. & Badzinski, D. Expanding northward: Influence  
434 of climate change, forest connectivity, and population processes on a threatened species’  
435 range shift. *Glob. Chang. Biol.* **17**, 17–31 (2011).
- 436 40. Tombre, I. M., Oudman, T., Shimmings, P., Griffin, L. & Prop, J. Northward range  
437 expansion in spring-staging barnacle geese is a response to climate change and population

- 438 growth, mediated by individual experience. *Glob. Chang. Biol.* **25**, 3680–3693 (2019).
- 439 41. Rushing, C. S., Andrew Royle, J., Ziolkowski, D. J. & Pardieck, K. L. Migratory behavior  
440 and winter geography drive differential range shifts of eastern birds in response to recent  
441 climate change. *Proc. Natl. Acad. Sci. U. S. A.* **117**, 12897–12903 (2020).
- 442 42. D’Andrea, L. *et al.* Climate change, anthropogenic disturbance and the northward range  
443 expansion of *Lactuca serriola* (Asteraceae). *J. Biogeogr.* **36**, 1573–1587 (2009).
- 444 43. Fossheim, M. *et al.* Recent warming leads to a rapid borealization of fish communities in  
445 the Arctic. *Nat. Clim. Chang.* **5**, 673–677 (2015).
- 446 44. Yapıcı, S., Bilge, G. & Filiz, H. Northwards range expansion of *Sparisoma cretense*  
447 (Linnaeus, 1758) in the Turkish Aegean Sea. *J. Aquac. Eng. Fish. Res.* 201–207 (2016).  
448 doi:10.3153/jaefr16022
- 449 45. Spies, I. *et al.* Genetic evidence of a northward range expansion in the eastern Bering Sea  
450 stock of Pacific cod. *Evol. Appl.* **13**, 362–375 (2020).
- 451 46. Ogden, N. H. *et al.* Climate change and the potential for range expansion of the Lyme  
452 disease vector *Ixodes scapularis* in Canada. *Int. J. Parasitol.* **36**, 63–70 (2006).
- 453 47. Clow, K. M. *et al.* Northward range expansion of *Ixodes scapularis* evident over a short  
454 timescale in Ontario, Canada. *PLoS One* **12**, 1–15 (2017).
- 455 48. Sagurova, I. *et al.* Predicted northward expansion of the geographic range of the tick  
456 vector *Amblyomma americanum* in North America under future climate conditions.  
457 *Environ. Health Perspect.* **127**, 1–14 (2019).

- 458 49. Kurz, W. A. *et al.* Mountain pine beetle and forest carbon feedback to climate change.  
459 *Nature* **452**, 987–990 (2008).
- 460 50. Sambaraju, K. R., Carroll, A. L. & Aukema, B. H. Multiyear weather anomalies  
461 associated with range shifts by the mountain pine beetle preceding large epidemics. *For.*  
462 *Ecol. Manage.* **438**, 86–95 (2019).
- 463 51. Parmesan, C. & Yohe, G. A globally coherent fingerprint of climate change impacts  
464 across natural systems. **421**, 37–42 (2003).
- 465 52. Platts, P. J. *et al.* Habitat availability explains variation in climate-driven range shifts  
466 across multiple taxonomic groups. *Sci. Rep.* **9**, 1–10 (2019).
- 467 53. Geerts, A. N. *et al.* Rapid evolution of thermal tolerance in the water flea *Daphnia*. *Nat.*  
468 *Clim. Chang.* **5**, 665–668 (2015).
- 469 54. Bozinovic, F., Medina, N. R., Alruiz, J. M., Cavieres, G. & Sabat, P. Thermal tolerance  
470 and survival responses to scenarios of experimental climatic change: changing thermal  
471 variability reduces the heat and cold tolerance in a fly. *J. Comp. Physiol. B Biochem. Syst.*  
472 *Environ. Physiol.* **186**, 581–587 (2016).
- 473 55. Cuenca Cambronero, M., Beasley, J., Kissane, S. & Orsini, L. Evolution of thermal  
474 tolerance in multifarious environments. *Mol. Ecol.* **27**, 4529–4541 (2018).
- 475 56. Eliason, E. J. *et al.* Differences in thermal tolerance among sockeye salmon populations.  
476 *Science (80- )*. **332**, 109–112 (2011).
- 477 57. Hovel, R. A., Carlson, S. M. & Quinn, T. P. Climate change alters the reproductive

- 478 phenology and investment of a lacustrine fish, the three-spine stickleback. *Glob. Chang.*  
479 *Biol.* 1–13 (2016). doi:10.1111/gcb.13531
- 480 58. Gómez-Ruiz, E. P. & Lacher, T. E. Climate change, range shifts, and the disruption of a  
481 pollinator-plant complex. *Sci. Rep.* **9**, 1–10 (2019).
- 482 59. Horton, K. G. *et al.* Phenology of nocturnal avian migration has shifted at the continental  
483 scale. *Nat. Clim. Chang.* **10**, 63–68 (2020).
- 484 60. Cullingham, C. I. *et al.* Mountain pine beetle host-range expansion threatens the boreal  
485 forest. *Mol. Ecol.* **20**, 2157–2171 (2011).
- 486 61. McLeod, D. J., Hallegraeff, G. M., Hosie, G. W. & Richardson, A. J. Climate-driven  
487 range expansion of the red-tide dinoflagellate *Noctiluca scintillans* into the Southern  
488 Ocean. *J. Plankton Res.* **34**, 332–337 (2012).
- 489 62. Bebbler, D. P. Range-Expanding Pests and Pathogens in a Warming World. *Annu. Rev.*  
490 *Phytopathol.* **53**, 335–356 (2015).
- 491 63. Hutchison, V. H. Comparative Biology Critical Thermal Maxima in Salamanders. *Physiol.*  
492 *Zool.* **34**, 92–125 (1961).
- 493 64. Fangué, N. A., Hofmeister, M. & Schulte, P. M. Intraspecific variation in thermal  
494 tolerance and heat shock protein gene expression in common killifish, *Fundulus*  
495 *heteroclitus*. *J. Exp. Biol.* **209**, 2859–2872 (2006).
- 496 65. Beitinger, T., Bennett, W. & McCauley, R. Temperature tolerances of North American  
497 freshwater fishes exposed to dynamic changes in temperature. *Environ. Biol. Fishes* **58**,

- 498 237–275 (2000).
- 499 66. Catchen, J., Hohenlohe, P. A., Bassham, S., Amores, A. & Cresko, W. A. Stacks: An  
500 analysis tool set for population genomics. *Mol. Ecol.* **22**, 3124–3140 (2013).
- 501 67. Li, H. & Durbin, R. Fast and accurate long-read alignment with Burrows-Wheeler  
502 transform. *Bioinformatics* **26**, 589–595 (2010).
- 503 68. Puritz, J. B., Hollenbeck, C. M. & Gold, J. R. *dDocent*: a RADseq, variant-calling  
504 pipeline designed for population genomics of non-model organisms. *PeerJ* **2**, e431 (2014).
- 505 69. Danecek, P. *et al.* The variant call format and VCFtools. *Bioinformatics* **27**, 2156–2158  
506 (2011).
- 507 70. Rastas, P. Lep-MAP3: Robust linkage mapping even for low-coverage whole genome  
508 sequencing data. *Bioinformatics* **33**, 3726–3732 (2017).
- 509 71. R Core Team. R: A language and environment for statistical computing. (2019).
- 510 72. Broman, K. W., Wu, H., Sen, S. & Churchill, G. A. R/qtl: QTL mapping in experimental  
511 crosses. *Bioinformatics* **19**, 889–890 (2003).
- 512 73. Lovell, J. qtlTools. (2019).
- 513 74. Ouellette, L. A., Reid, R. W., Blanchard, S. G. & Brouwer, C. R. LinkageMapView-  
514 rendering high-resolution linkage and QTL maps. *Bioinformatics* **34**, 306–307 (2018).
- 515 75. Broman, K. W. & Sen, S. *A Guide to QTL Mapping with R/qtl*. **46**, (Springer, 2009).
- 516 76. Arends, D., Prins, P., Broman, K. W. & Jansen, R. C. *Tutorial-Multiple-QTL Mapping*



- 517            *(MQM) Analysis for R/qlt*. <http://www.rqtl.org/tutorials/MQM-tour.pdf> (2014).
- 518    77.    Greenwood, A. K. *et al.* The genetic basis of divergent pigment patterns in juvenile  
519            threespine sticklebacks. *Heredity (Edinb)*. **107**, 155–166 (2011).
- 520    78.    Wiens, J., Stralberg, D., Jongsomjit, D., Howell, C. & Snyder, M. Niches, models, and  
521            climate change: Assessing the assumptions and uncertainties. *Proc. Natl. Acad. Sci.* **106**,  
522            19729–19736 (2009).
- 523    79.    Bayly, I. A. E. Salinity Tolerance and Osmotic Behavior of Animals in Athalassic Saline  
524            and Marine Hypersaline Waters. *Annu. Rev. Ecol. Syst.* **3**, 233–268 (2003).
- 525    80.    Divino, J. N. *et al.* Osmoregulatory physiology and rapid evolution of salinity tolerance in  
526            threespine stickleback recently introduced to fresh water. *Evol. Ecol. Res.* **17**, 179–201  
527            (2016).
- 528    81.    Zweng, M. M. *et al.* *World Ocean Atlas 2013, Volume 2: Salinity*. NOAA Atlas NESDIS  
529            74 **2**, (2013).
- 530    82.    Weatherall, P. *et al.* A new digital bathymetric model of the world’s oceans. *Earth Sp. Sci.*  
531            **2**, 331–345 (2015).
- 532    83.    Fetterer, F., Savoie, M., Helfrich, S. & Clemene-Colon, P. U.S. National Ice Center and  
533            National Snow and Ice Data Center. *Multisensor Analyzed Sea Ice Extent - Northern*  
534            *Hemisphere (MASIE-NH)* (2010). doi:<https://doi.org/10.7265/N5GT5K3K>.
- 535    84.    Reynolds, R. *et al.* Daily High-Resolution-Blended Analyses for Sea Surface  
536            Temperature. *J. Clim.* **20**, 5473–5496 (2007).

- 537 85. Johannessen, O. *et al.* Arctic climate change: observed and modelled temperature and sea-  
538 ice variability. *Tellus A Dyn. Meteorol. Oceanogr.* **56**, 328–341 (2004).
- 539 86. Hijmans, R. J. *et al.* raster: Geographic data analysis and modelling. (2020).
- 540 87. Roger, A., Stuetz, R., Ove, K., Giraudoux, P. & Santilli, S. rgeos: Interface to geometry  
541 engine - open. (2020).
- 542 88. Detrich, H. W., Parker, S. K., Williams, J., Nogales, E. & Downing, K. H. Cold adaptation  
543 of microtubule assembly and dynamics. Structural interpretation of primary sequence  
544 changes present in the  $\alpha$ - and  $\beta$ -tubulins of antarctic fishes. *J. Biol. Chem.* **275**, 37038–  
545 37047 (2000).
- 546 89. Cheng, C. H. C. & Detrich, H. W. Molecular ecophysiology of Antarctic notothenioid  
547 fishes. *Philos. Trans. R. Soc. B Biol. Sci.* **362**, 2215–2232 (2007).
- 548 90. Shin, S. C. hu. *et al.* The genome sequence of the Antarctic bullhead notothen reveals  
549 evolutionary adaptations to a cold environment. *Genome Biol.* **15**, 468 (2014).
- 550 91. Environmental Systems Research Institute. ArcGIS Desktop: Release 10.8. (2017).

## 551 Acknowledgments

552 The authors acknowledge that the species collections took place on Huu-ay-aht and Sechelt First  
553 Nations traditional territories and are grateful for the opportunity to conduct their research in  
554 protected and sacred areas. We would like to thank the Bamfield Marine Sciences Centre for the  
555 resources required to conduct this research, Sam Owens for the photo in Figure 1a, Peter Peller  
556 for creating Figure 1b, as well as Daniel Wuitchik, Sam Yeaman, Jennifer Sunday, and Patrick  
557 Nosil for feedback on the manuscript.

558 **Author Contributions**

559 This study was designed by SJSW, RDHB, and SMR; fish husbandry and breeding by SJSW and  
560 TNB; experimental data collection by SJSW; DNA sequencing and initial processing by AP;  
561 bioinformatic and QTL analyses by SJSW; species distribution modelling by SJSW and SM; the  
562 manuscript was written by SJSW, RDHB, and SMR, with input from authors; the study was  
563 funded by HAJ, RDHB, and SMR.

564

565 Competing Interests: The authors declare no competing interests.

566

567

568 **Figures and Tables**

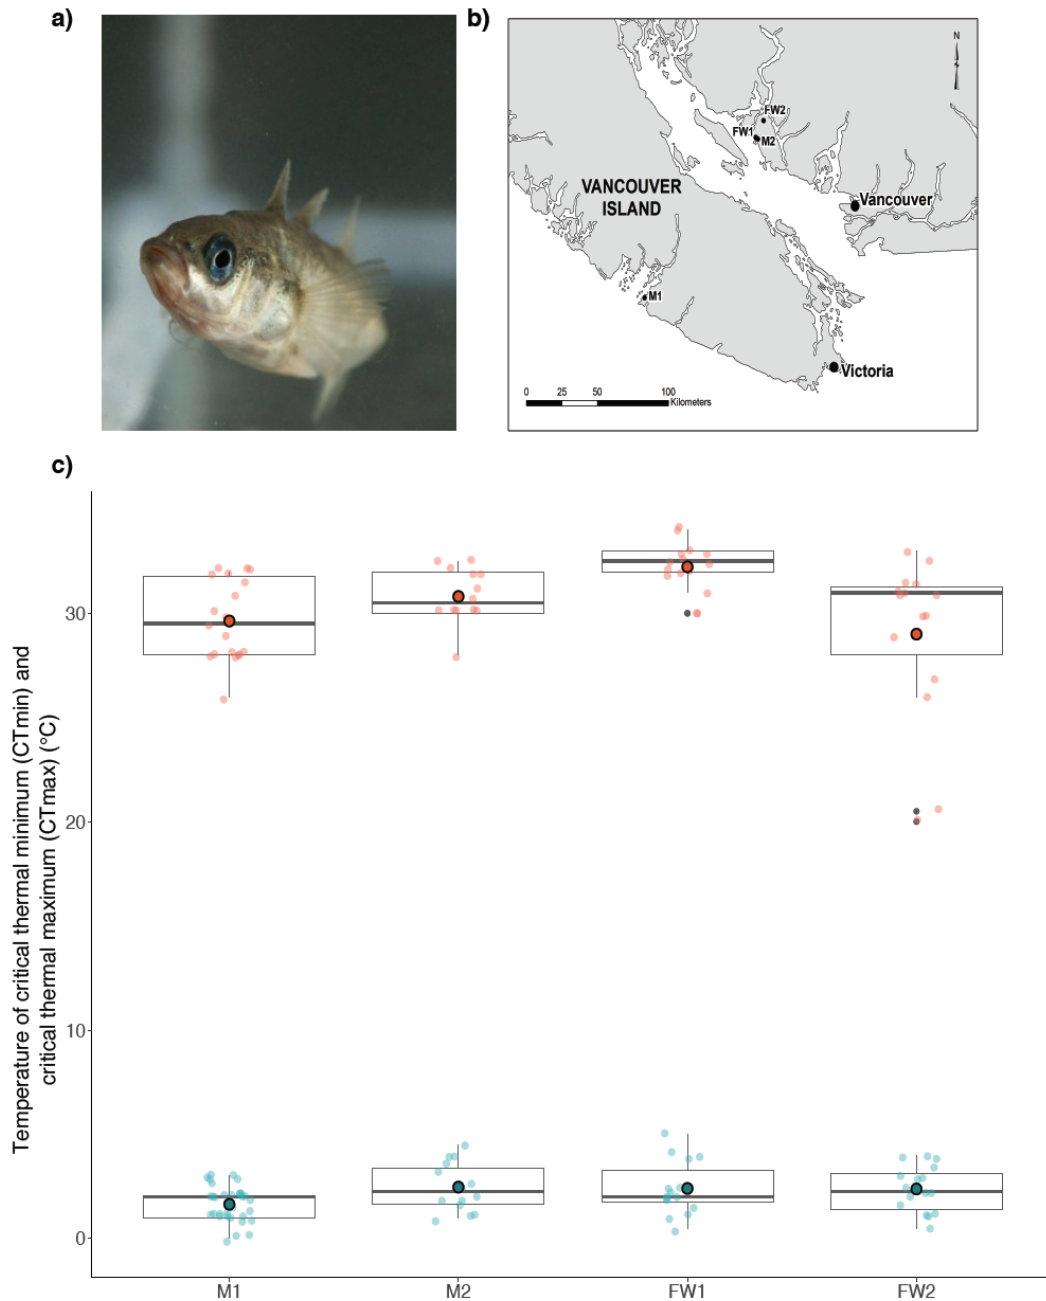

569

570 **Figure 1.** a) Adult threespine stickleback (*Gasterosteus aculeatus*) from a single genetic cluster  
571 were sampled from b) two marine and two freshwater populations in the Canadian Pacific  
572 Northwest. These populations were assayed for c) critical thermal minima and maxima. Thermal  
573 trait values for marine populations (M1 and M2) were incorporated into the species distribution  
574 models, while marine and freshwater populations (M1, FW1, and FW2) were used to generate F1  
575 and F2 generations for linkage map construction and quantitative trait loci (QTL) analyses.

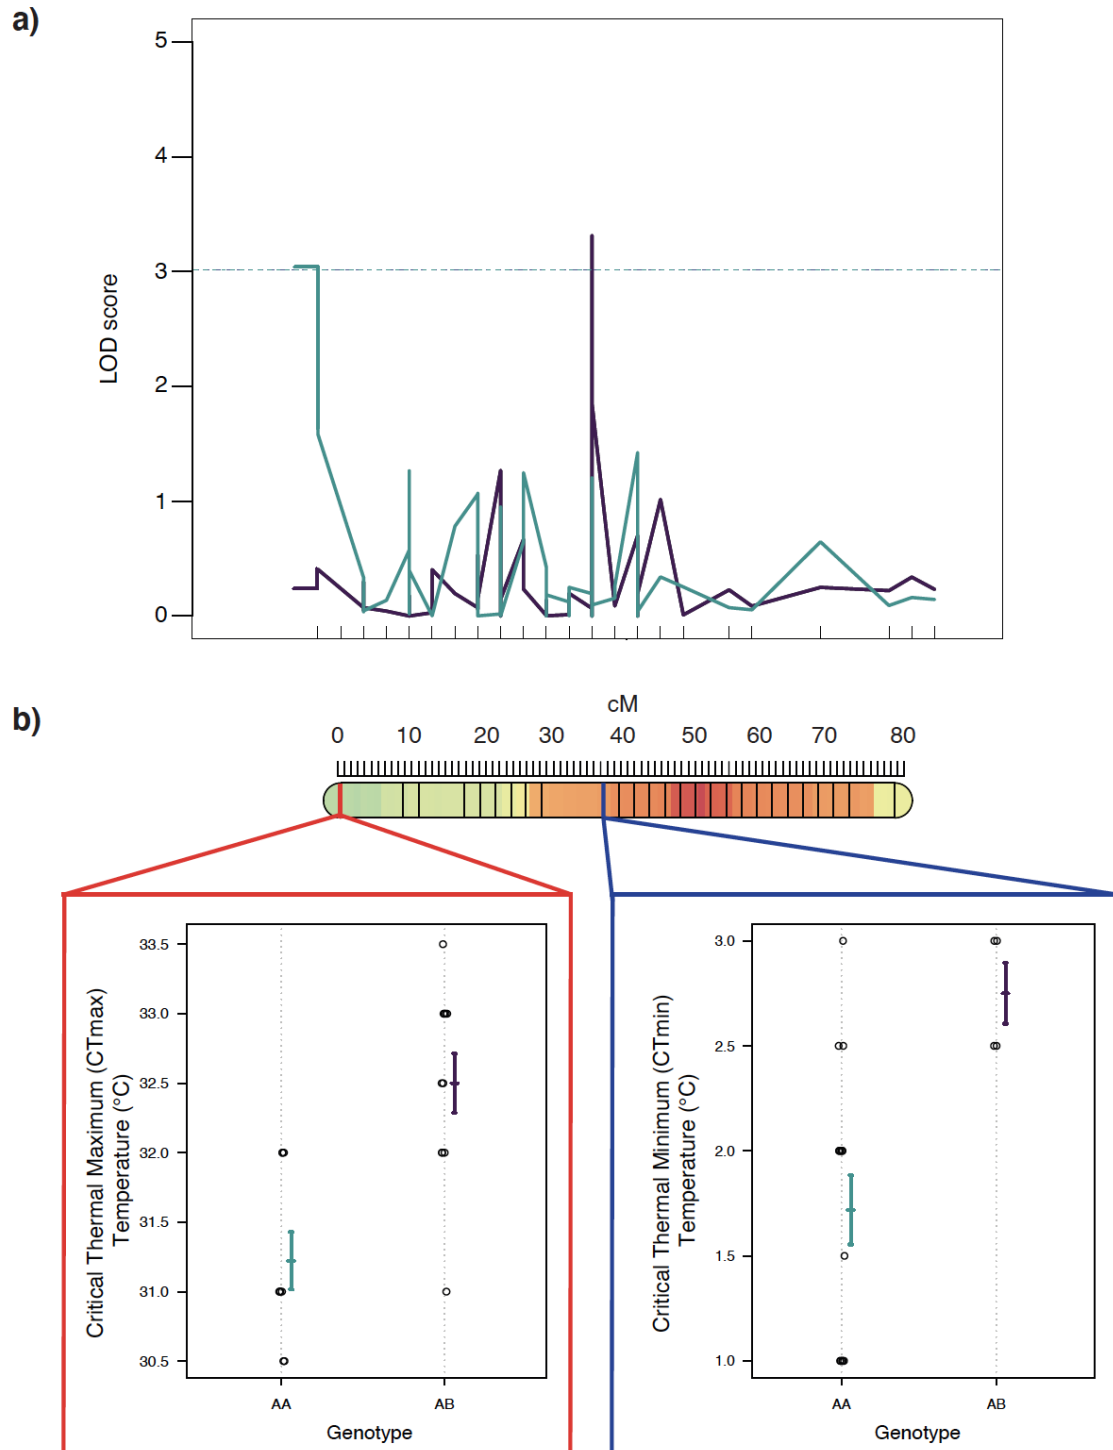

576  
577 **Figure 2.** a) Quantitative trait loci (QTL) scan of linkage group 4 with trait-specific significance  
578 thresholds for LOD scores, showing a significant LOD peak for CTmin (dark purple) and  
579 CTmax (light blue) with b) an inset of linkage group 4 highlighting the position of the significant  
580 QTL for upper and lower thermal tolerances (CTmax and CTmin, respectively).

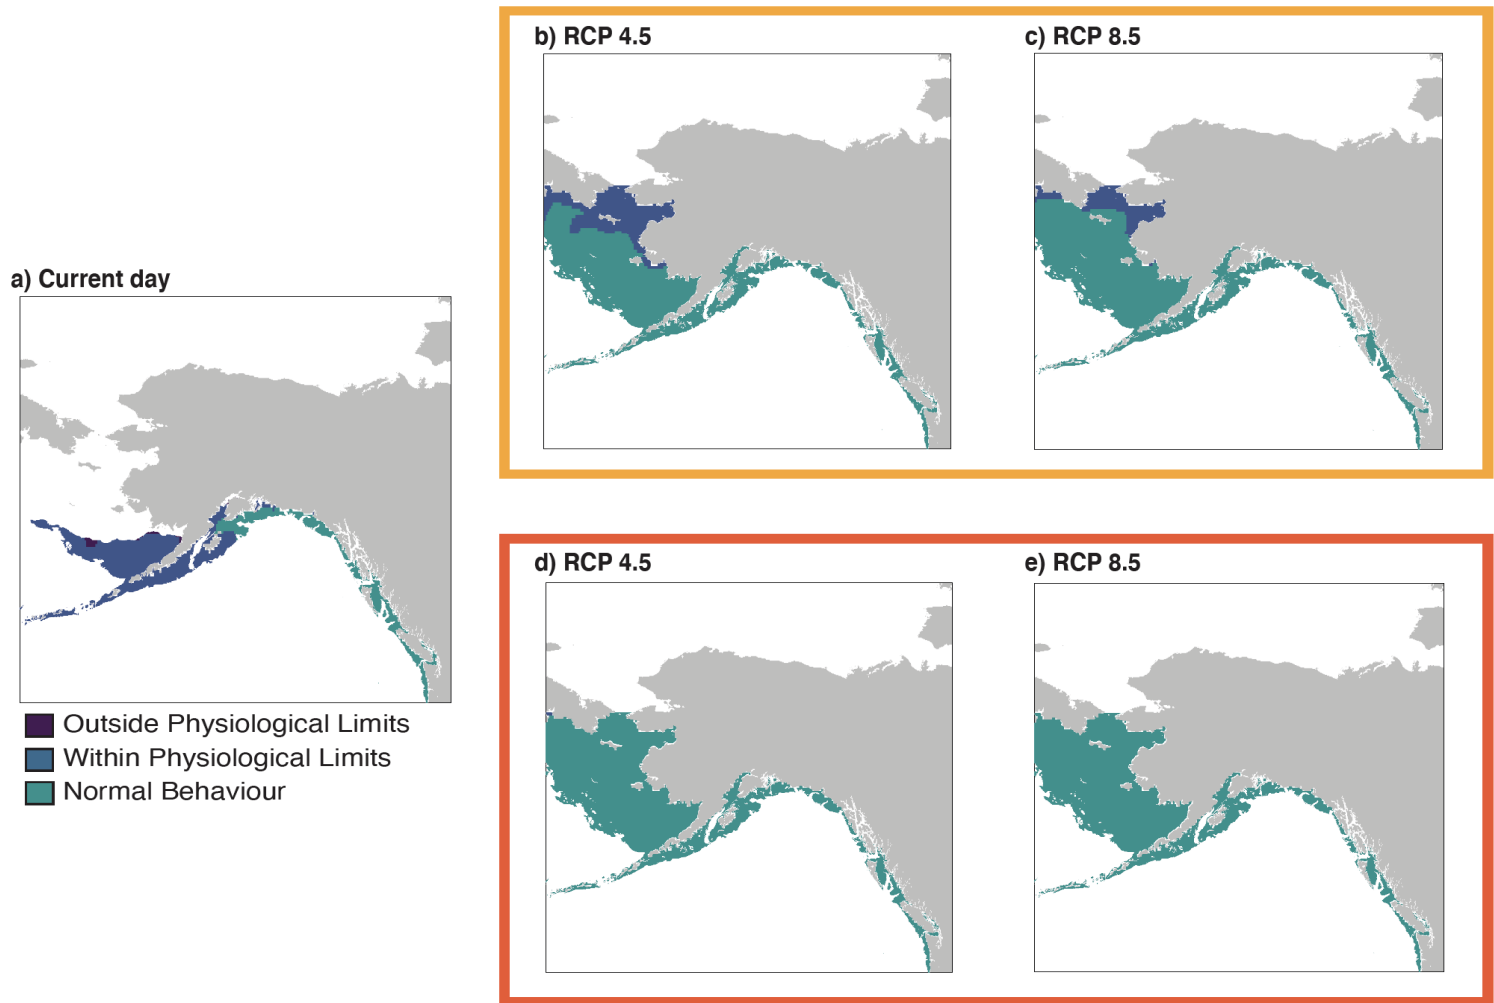

**Figure 3.** Changes in the distribution of marine threespine stickleback (*Gasterosteus aculeatus*) as a result of incorporating thermal traits in a) current day environmental conditions and under IPCC end-of-century projections RCP 4.5 and 8.5 without trait evolution ('no evolution' model, b & c, orange box) and with trait evolution ('evolution' model, d & e, red box).

## Supplementary Figures and Tables

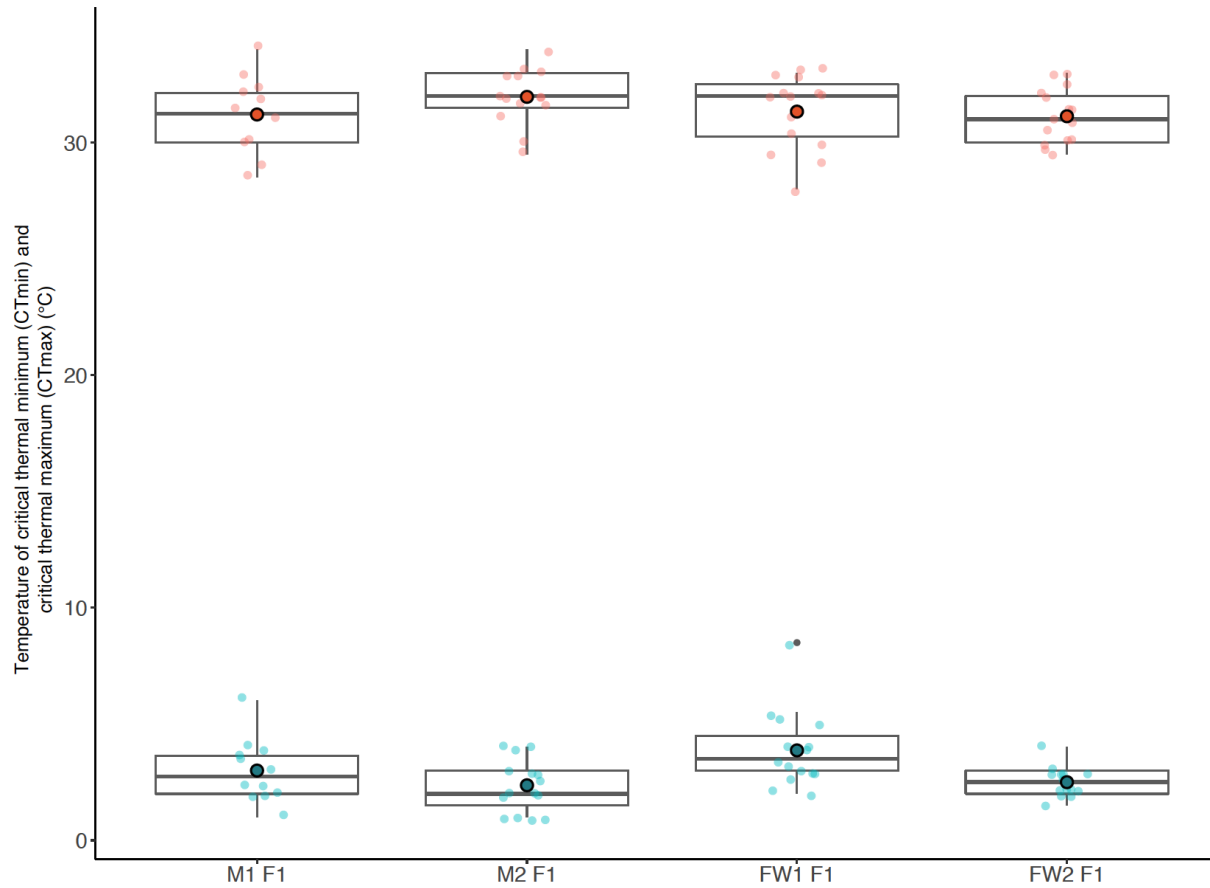

**Figure S1.** Critical thermal minimum (CTmin) and maximum (CTmax) measurements for adult threespine stickleback (*Gasterosteus aculeatus*) from pure F1 marine (M\*F1) and freshwater (FW\*F1) families raised in a common garden under a constant thermal environment.

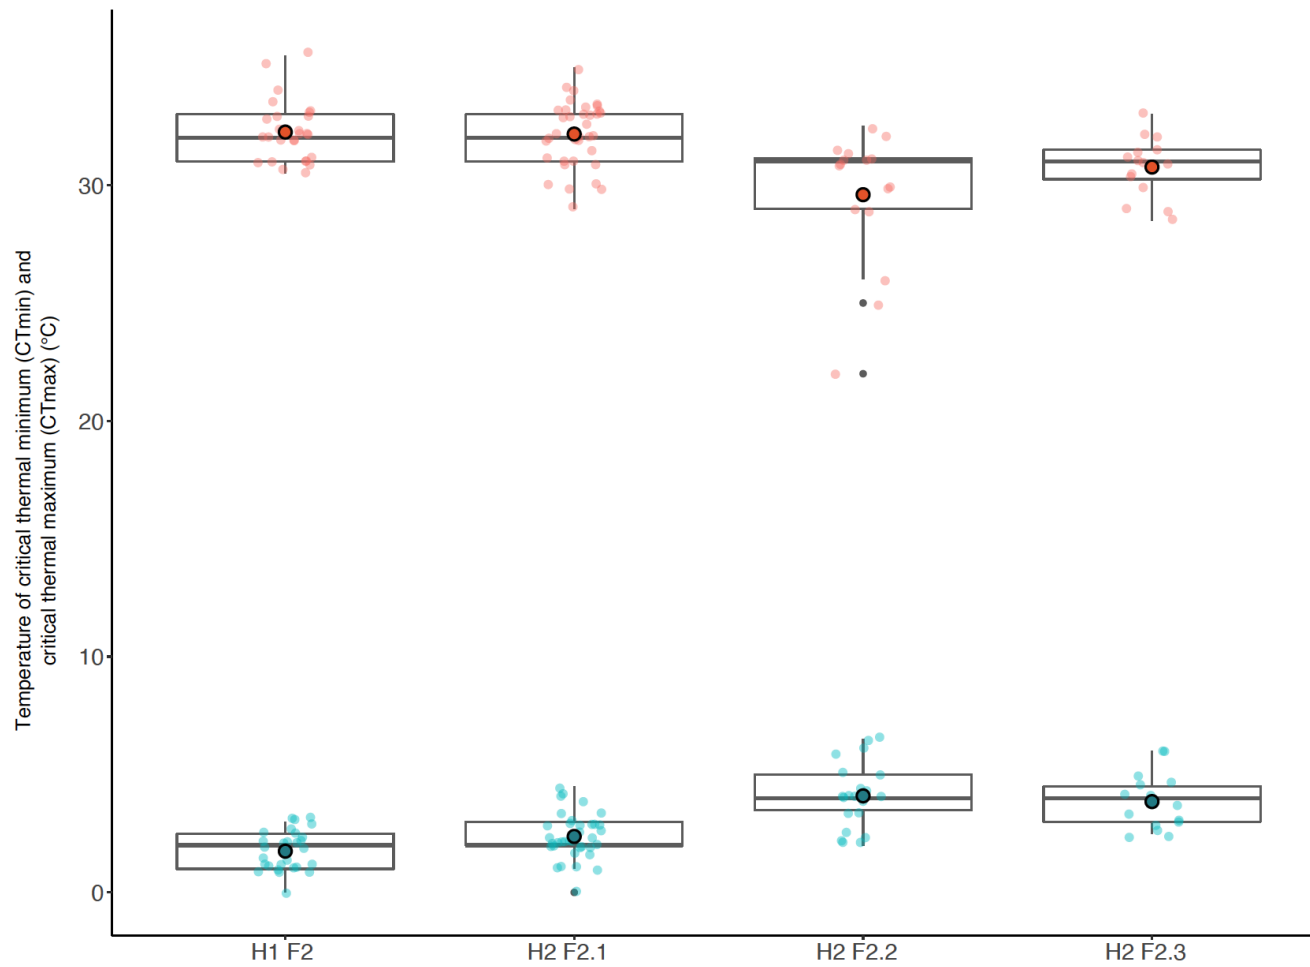

**Figure S2.** Critical thermal minimum (CTmin) and maximum (CTmax) measurements for adult threespine stickleback (*Gasterosteus aculeatus*) from hybrid marine-freshwater F2 families raised in a common garden under a constant thermal environment.



a) RCP 4.5

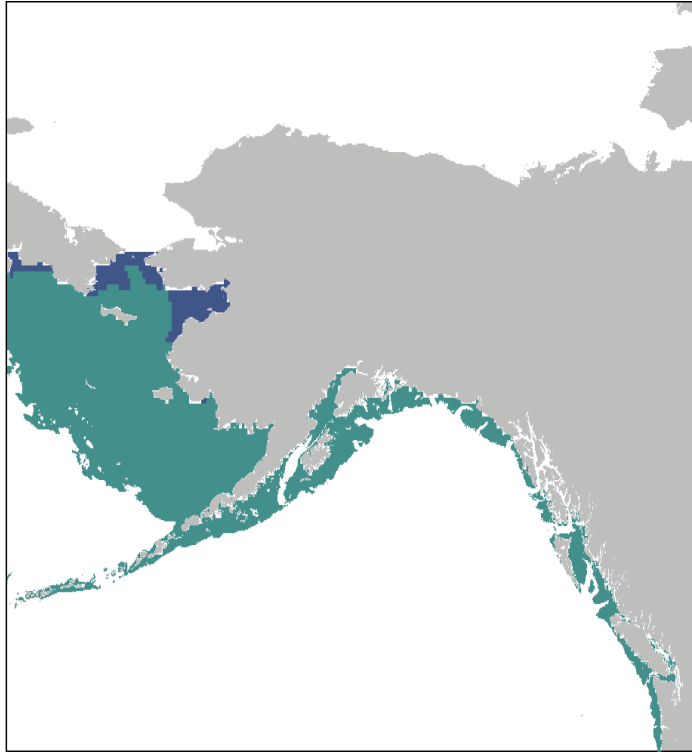

b) RCP 8.5

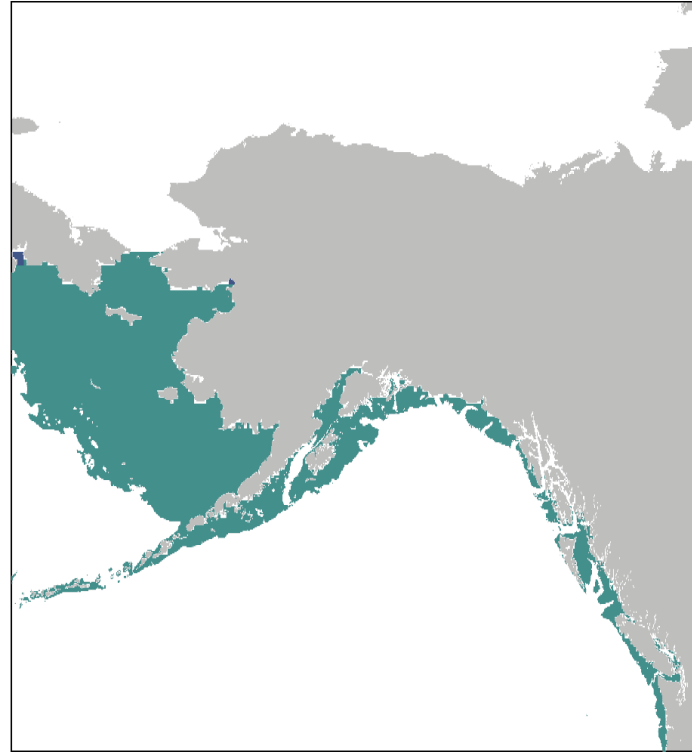

■ Within Physiological Limits  
■ Normal Behaviour

**Figure S3.** Changes in the distribution of marine threespine stickleback (*Gasterosteus aculeatus*) as a result of incorporating thermal traits under IPCC end-of-century projections RCP 4.5 and 8.5 with trait evolution constrained by the underlying genetic architecture of critical thermal minimum (CT<sub>min</sub>) as determined from hybrid F2 mapping families.

a) RCP 4.5

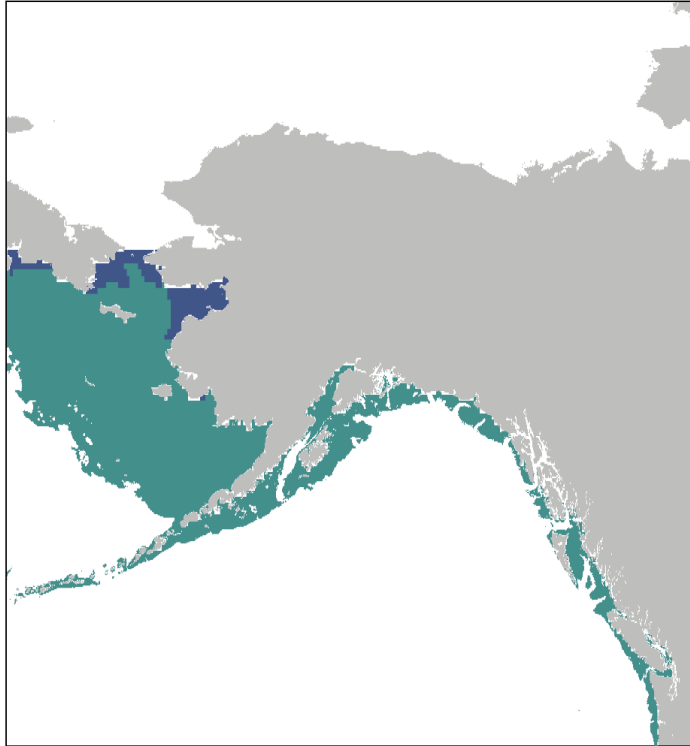

b) RCP 8.5

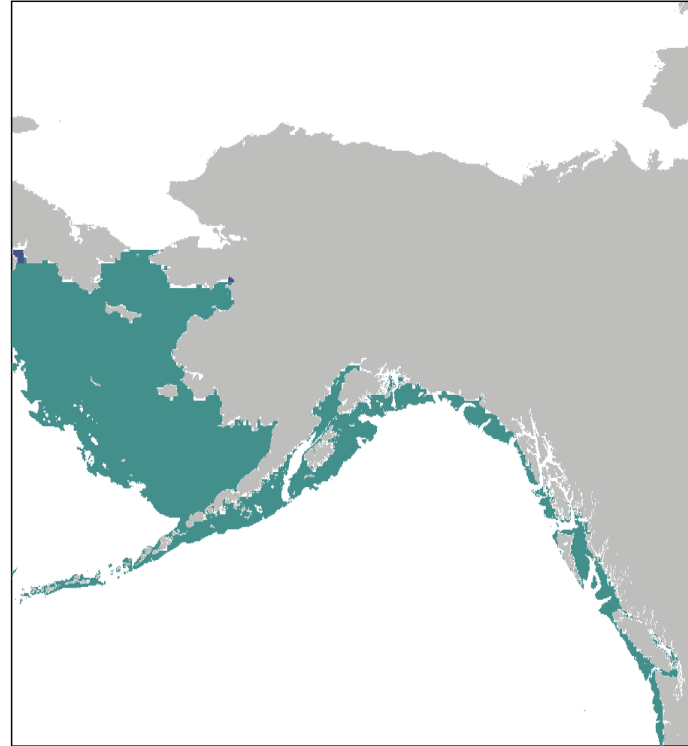

■ Within Physiological Limits  
■ Normal Behaviour

**Figure S4.** Changes in the distribution of marine threespine stickleback (*Gasterosteus aculeatus*) as a result of incorporating thermal traits under IPCC end-of-century projections RCP 4.5 and 8.5 with trait evolution constrained by the underlying genetic architecture of critical thermal minimum (CT<sub>min</sub>) and critical thermal maximum (CT<sub>max</sub>) as determined from hybrid F<sub>2</sub> mapping families.

**Table S1.** Summaries of family-specific linkage maps constructed for quantitative trait loci (QTL) analyses.

| <b>Map</b> | <b><i>n</i>markers</b> | <b>Length (cM)</b> | <b>Avg. Max. Spacing</b> |
|------------|------------------------|--------------------|--------------------------|
| KL1        | 2139                   | 1370.4             | 7.6                      |
| KL2        | 1558                   | 1311               | 8.5                      |
| KL3        | 1964                   | 1359.5             | 7.9                      |
| HL         | 5247                   | 1621.1             | 11.8                     |

**Table S2.** Thermal trait data from *Gasterosteus aculeatus* used to inform the species distribution envelopes (rows) in the varied evolutionary scenarios (columns) projected for end-of-century conditions.

|                              | Current day      | No evolution     | Adjusted PVE   | Evolution      |
|------------------------------|------------------|------------------|----------------|----------------|
| Normal Behaviour             | (5 - 25)         | (5 - 25)         | (3.6 - 25)     | (2.5 - 25)     |
| Within Physiological Limits  | (0.9 - 31.9)     | (0.9 - 31.9)     | (0 - 31.9)     | (0 - 31.9)     |
| Outside Physiological Limits | $31.9 > x < 0.9$ | $31.9 > x < 0.9$ | $31.9 > x < 0$ | $31.9 > x < 0$ |
